# Supplementary material for: Comprehensive Analysis of a Japanese Pedigree with Biallelic ACAGG Expansions in RFC1 Manifesting Motor Neuronopathy with Painful Muscle Cramps
Source: PubMed Central journal article supplement (PMC11269323; doi:10.1007/s12311-024-01666-1), 2024-02-07
Supplement: 12311_2024_1666_MOESM2_ESM.pdf [file 12311_2024_1666_MOESM2_ESM.pdf]

**Supplementary Table e-1. PCR primers, conditions for Sanger sequencing and antibodies used for multiple immunohistochemistry**

| PCR primers, thermocycling conditions                                                                                                                   |                                            |
|---------------------------------------------------------------------------------------------------------------------------------------------------------|--------------------------------------------|
| Nested PCR<br>(1st amplification)                                                                                                                       | Forward 5'-CCTGAGTCCTCCTGACTGCT-3'         |
|                                                                                                                                                         | Reverse 5'-TCTGTTGAAACCAAGCTCCA-3'         |
| 98°C 3 min, [98°C 10 s, 62°C (each cycle decreasing by 0.5°C) 15 s, 72°C 3 min] × 10 cycles, [98°C 10 s, 57°C 15 s, 72°C 3 min] × 25 cycles, 72°C 5 min |                                            |
| Nested PCR<br>(2nd amplification)                                                                                                                       | Forward 5'-GTGGGAGACAGGCCAATCACTTCAG-3'    |
|                                                                                                                                                         | Reverse 5'-TCAAGTGATACTCCAGCTACACCGTTGC-3' |
| 98°C 3 min, [98°C 10s, 68°C 15s, 72°C 3 min] × 35 cycles, 72°C 5 min                                                                                    |                                            |
| Probe generation and gDNA<br>template amplification                                                                                                     | Forward 5'-CCCCAAAAGCAATTCAGAGA-3'         |
|                                                                                                                                                         | Reverse 5'-CTGCCTTCTCGTGTTCCT-3'           |
| 95°C 4 min, [95°C 30 s, 60°C 30 s, 72°C 60 s] × 38 cycles, 72°C 5 min                                                                                   |                                            |

| Target Protein                         | Host   | Clone/Cat. # | Dilution | Manufacturer |
|----------------------------------------|--------|--------------|----------|--------------|
| <b>Primary Antibodies</b>              |        |              |          |              |
| RFC1                                   | Rabbit | GTX129291    | 1:100    | GeneTex      |
| SQSTM1/p62                             | Mouse  | M162-3       | 1:200    | MBL          |
| NCAM/CD56                              | Mouse  | LS-C348390   | 1:1      | LSBio        |
| <b>Secondary Antibodies/Conjugates</b> |        |              |          |              |
| Mouse IgG/Alexa Fluor 568              | Goat   | A-11031      | 1:400    | Invitrogen   |
| Rabbit IgG/Alexa Fluor 488             | Goat   | A-11034      | 1:400    | Invitrogen   |
| Hoechst33342                           |        | H342         | 1:1000   | Dojindo      |

**Supplementary Table e-2. Results of the LTL assay**

| Individual | Age at blood<br>sampling/sex | <i>RFC1</i><br>expansion | LTL①<br>(kb) | LTL②<br>(kb) | Mean LTL (kb) |
|------------|------------------------------|--------------------------|--------------|--------------|---------------|
| Pt-1       | 62 y M                       | homozygous               | 6.49         | 6.41         | 6.45          |
| Pt-2       | 61 y M                       | homozygous               | 6.46         | 6.61         | 6.54          |
| Pt-3       | 58 y F                       | homozygous               | 7.24         | 7.12         | 7.18          |
| II-7       | 69 y M                       | heterozygous             | 7.16         | 7.08         | 7.12          |
| II-9       | 62 y F                       | no expansion             | 7.50         | 7.24         | 7.37          |
